# Supplementary material for: Bis(ethylmaltolato)oxidovanadium(iv) inhibited the pathogenesis of Alzheimer’s disease in triple transgenic model mice
Source: Royal Society of Chemistry journal article supplement (doi:10.1039/c9mt00271e), 2020-01-03
Supplement: c9mt00271e1.pdf [file c9mt00271e1.pdf]

## 1 Supplementary data

### 2 Table 1

3 The milestones for the discoveries of vanadium in chemistry and biological effect.

| Time                                                                          | major events                                                                                 | References                                                                |
|-------------------------------------------------------------------------------|----------------------------------------------------------------------------------------------|---------------------------------------------------------------------------|
| 1830                                                                          | Vanadium was discovered in Sweden by Nils Sefstrom                                           | Sjoberg, Sven Gosta, Journal of Chemical Education, 1951, 28(6):294.      |
| 1867                                                                          | Vanadium metal was first isolated by chemist Henry Enfield Roscoe                            | Bartel, et al, Chemkon, 2016, 23(3):125-130.                              |
| 1985                                                                          | Vanadium (vanadate) first appeared to have an insulin-like action                            | Heyliger C E, Tahiliani A G, McNeill J H. Science, 1985 , 227:1474 — 1477 |
| 1990                                                                          | Bis(2-ethyl-3-hydroxy-4-pyronato)oxovanadium(IV) (BEOV), was first synthesized               | Thompson et al, Metal Ions in Biological Systems, 2004, 41:221-252        |
| 2005                                                                          | Alzheimer's Disease was a Type 3 Diabetes and share common cellular and molecular mechanisms | Eric, et al, Journal of Alzheimer's disease, 2005, 7(1):63-80             |
| 2008                                                                          | BEOV advanced to PhaseII clinical trials for the treatment of diabetes                       | Thompson et al, Journal of Inorganic Biochemistry, 2009, 103(4):554-558   |
| 2019                                                                          | Vanadium (Vanadyl (IV) acetylacetonate) was first tested on AD in vitro and in vivo models   | Dong et al, Science China. Life sciences, 2019, 62(1)                     |
| Whether BEOV inhibit AD pathology and possibly be developed for anti-AD drug? |                                                                                              |                                                                           |

4

5

## 1 Table 2

### 2 Primary antibody information

| <b>Antibody</b> | <b>Host</b> | <b>Application</b>           | <b>Source</b> | <b>Identifier</b> |
|-----------------|-------------|------------------------------|---------------|-------------------|
| APP             | Rabbit      | WB (1:10000)                 | Abcam         | Cat#ab32136       |
| BACE1           | Rabbit      | WB (1:3000)                  | Abcam         | Cat#ab108394      |
| sAPP $\alpha$   | Rabbit      | WB (1:500)                   | Biolegend     | Cat#813501        |
| sAPP $\beta$    | Rabbit      | WB (1:500)                   | Biolegend     | Cat#813401        |
| A $\beta$ 1-42  | Rabbit      | WB (1:500)                   | Millipore     | Cat#AB5078P       |
| A $\beta$ 1-16  | Mouse       | WB (1:500)/IHC<br>(1:50)     | Biolegend     | Cat#803003        |
| HT5             | Mouse       | WB (1:1000)                  | Abcam         | Cat#ab80579       |
| HT7             | Mouse       | WB (1:1000)                  | Thermo        | Cat#MN1000        |
| Tau-pSer404     | Rabbit      | WB (1:2000)                  | Abcam         | Cat#ab92676       |
| Tau-pThr231     | Rabbit      | WB (1:5000)<br>/IHC (1:200)  | Abcam         | Cat#ab151559      |
| Tau-pSer396     | Rabbit      | WB (1:10000)<br>/IHC (1:200) | Abcam         | Cat#ab109390      |
| Tau-pSer422     | Rabbit      | WB (1:5000)                  | Abcam         | Cat#ab79415       |
| Tau-pSer262     | Rabbit      | WB (1:2000)                  | Abcam         | Cat#ab64193       |
| PSD95           | Rabbit      | WB (1:5000)<br>/IHC (1:500)  | Abcam         | Cat#ab18258       |

|                    |         |               |                |                    |
|--------------------|---------|---------------|----------------|--------------------|
| Tau1               | Rabbit  | WB (1:3000)   | Millipore      | Cat#MAB3420        |
| Synaptophysin      | Rabbit  | WB (1:10000)  | Abcam          | Cat#ab32127        |
| AKT                | Rabbit  | WB (1:1000)   | Abcam          | Cat#ab8805         |
| p-AKT              | Rabbit  | WB (1:1000)   | Abcam          | Cat#ab81283        |
| GSK3 $\beta$       | Rabbit  | WB (1:5000)   | Abcam          | Cat#ab32391        |
| GSK3 $\beta$ pY216 | Rabbit  | WB (1:3000)   | Abcam          | Cat#ab75745        |
| GSK3 $\beta$ pSer9 | Rabbit  | WB (1:5000)   | Abcam          | Cat#ab131079       |
| JAK2               | Rabbit  | WB (1:1000)   | Cell Signaling | Cat#3230           |
| p-JAK2             | Rabbit  | WB (1:1000)   | Cell Signaling | Cat#3776           |
| STAT3              | Rabbit  | WB (1:1000)   | Cell Signaling | Cat#12640          |
| p-STAT3            | Rabbit  | WB (1:1000)   | Cell Signaling | Cat#9145           |
| SOCS1              | Rabbit  | WB (1:1000)   | Cell Signaling | Cat#3950           |
| InsR               | Rabbit  | WB (1:1000)   | Cell Signaling | Cat#3025           |
| p-InsR             | Rabbit  | WB (1:1000)   | Cell Signaling | Cat#3024           |
| PTP1B              | Rabbit  | WB (1:1000)   | Cell Signaling | Cat#5311           |
| IDE                | Rabbit  | WB (1:3000)   | Abcam          | Cat#ab109538       |
| PPAR $\gamma$      | Rabbit  | WB (1:1000)   | Cell Signaling | Cat#2443           |
| GAPDH              | Rabbit  | WB (1:5000)   | Proteintech    | Cat#10494-1-<br>AP |
| MAP2               | Chicken | IHC (1:10000) | Abcam          | Cat#ab5392         |

1

2

3

4

5

6

7

8

9

10

11

12

# 1 Supplementary Figures

## 2 Supplementary Fig. 1

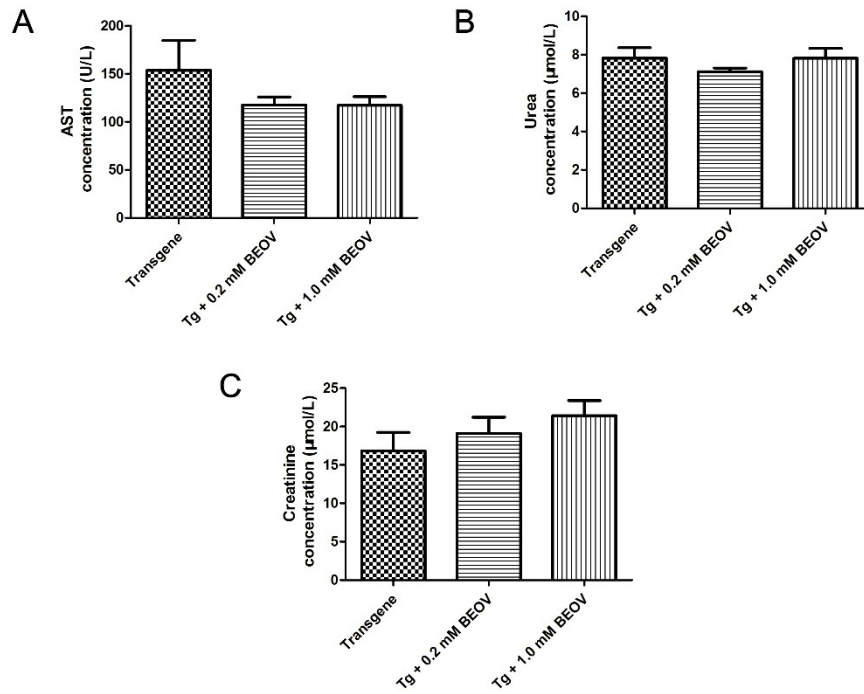

3

4 **Supplementary Fig. 1 The effect of BEOV on liver and renal function in 3xTg-AD**

5 **mice.** Serum was collected from triple transgenic AD (3xTg-AD) and BEOV-treated

6 AD mice. The levels of AST, urea and creatinine were measured (A-C), respectively.

7

8

# 1 Supplementary Fig. 2

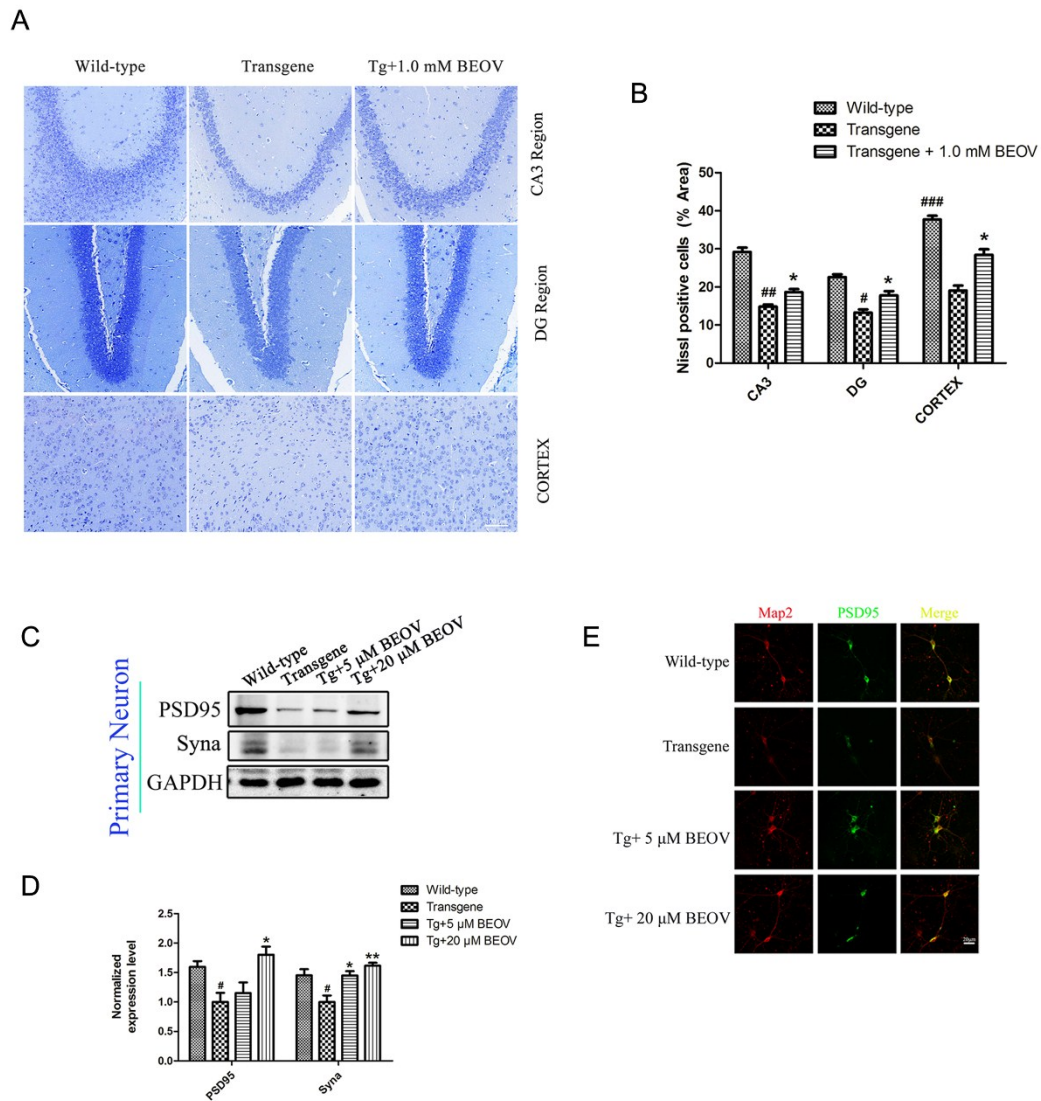

2

3 **Supplementary Fig. 2 Protective effect of BEOV on hippocampal neurons from**  
 4 **3×Tg-AD mice.** Images of Nissl staining in the hippocampal CA3 and DG regions and  
 5 cerebral cortex of wild-type, AD and BEOV-treated AD mice (**A** and **B**). Scale bar: 100  
 6 μm. Western blots and results of the semiquantitative analysis of synaptophysin and  
 7 PSD95 levels in primary cultures of hippocampal neurons from the wild-type, AD and  
 8 BEOV-treated AD mice (**C** and **D**). Images of immunofluorescence staining for MAP2  
 9 and PSD95 expression in primary cultures of hippocampal neurons from the wild-type,

1 AD and BEOV-treated AD mice (red: MAP2, green: PSD95. n = 3 samples per group)

2 **(E)** (#: WT vs AD; \*: AD + BEOV vs AD). (n=3; # $P<0.05$ , ## $P<0.01$ , ### $P<0.001$ ,

3 \* $P<0.05$ , \*\* $P<0.01$ ). Scale bar: 20  $\mu\text{m}$ .

4

1 **Supplementary Fig. 3**

A

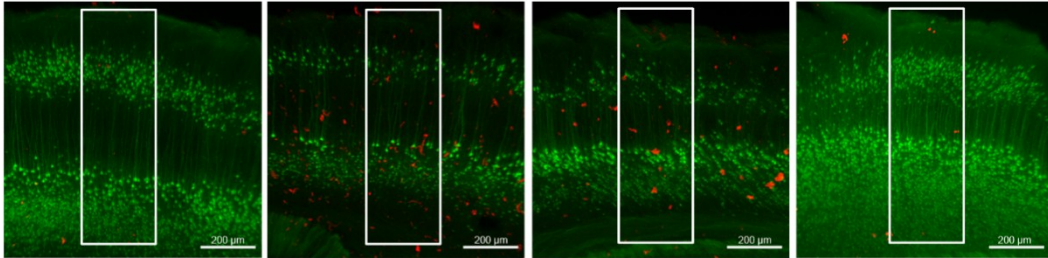

B

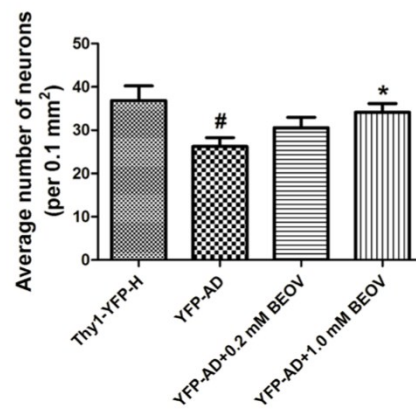

2

3 **Supplementary Fig. 3. BEOV attenuated neuronal reduction in the cortex of**  
4 **fluorescent AD mice.** The number of cortical neurons was counted in Thy1-YFP-H,  
5 YFP-AD and BEOV-treated YFP-AD mice (A and B) (#: YFP vs YFP-AD; \*: YFP-  
6 AD + BEOV vs YFP-AD). (n=3; # $P < 0.05$ , \* $P < 0.05$ ). Scale bar: 200 μm

7



1 **Supplementary Fig. 4**

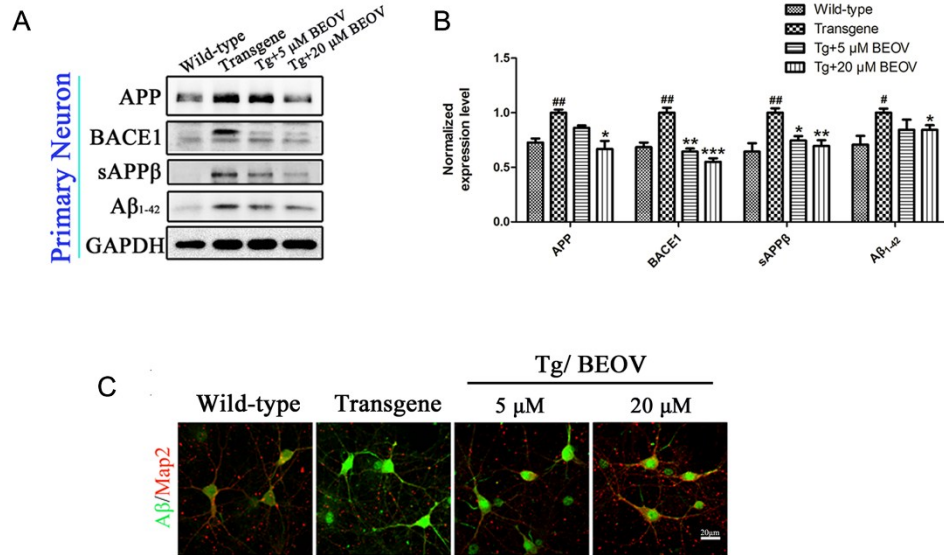

2

3 **Supplementary Fig. 4 Inhibition of BEOV on the amyloidogenic cascade in**  
 4 **primary neuron cultures.** Western blots and results of the semiquantitative analysis  
 5 of several key proteins involved in the amyloidogenic cascade in primary cultures of  
 6 hippocampal neurons from wild-type, AD and BEOV-treated AD mice (A and B).  
 7 Images of immunofluorescence staining for MAP2 and Aβ in those groups of primary  
 8 cultures of hippocampal neurons (red: MAP2, green: Aβ. n = 3 samples per group) (C)  
 9 (#: WT vs AD; \*: AD + BEOV vs AD). (n=3; # $P$ <0.05, ## $P$ <0.01, \* $P$ <0.05, \*\* $P$ <0.01  
 10 and \*\*\* $P$ <0.001). Scale bar: 20 μm.

11

# 1 Supplementary Fig. 5

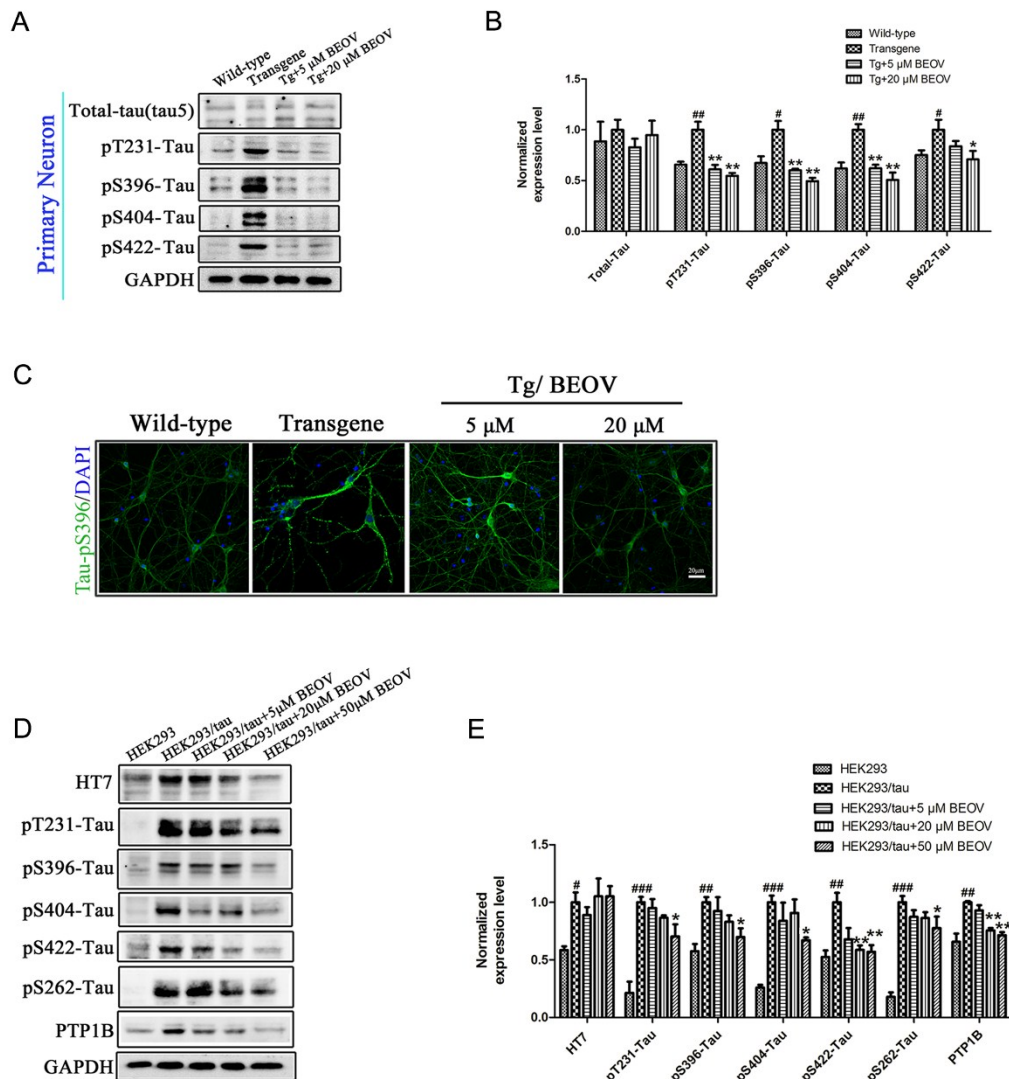

2

3 **Supplementary Fig. 5 BEOV attenuated tau hyperphosphorylation in primary**  
 4 **neuron cultures and HEK293/tau cells.** Western blots and results of the  
 5 semiquantitative analysis of tau phosphorylation at different amino acid positions in  
 6 primary neuron cultures from the brains of wild-type mice (**A** and **B**). Images of  
 7 immunofluorescence staining for phosphorylated tau (pS396-tau, green) and the  
 8 nucleus (DAPI, blue) in primary cultures of mouse hippocampal neurons (n = 3 samples  
 9 per group) (**C**). Western blots and results of the semiquantitative analysis of tau

1 phosphorylation at different amino acid positions and PTP1B levels in HEK293,  
2 HEK293/tau and BEOV-treated HEK293/tau cells (**D** and **E**). (n=3; # $P$ <0.05,  
3 ### $P$ <0.01, #### $P$ <0.001, \* $P$ <0.05, \*\* $P$ <0.01). Scale bar: 20  $\mu$ m

4

1 **Supplementary Fig. 6**

A

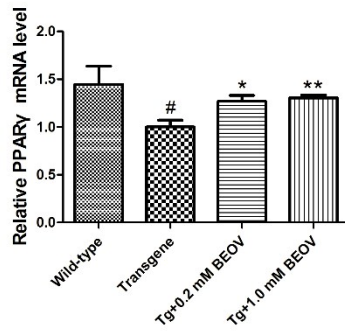

B

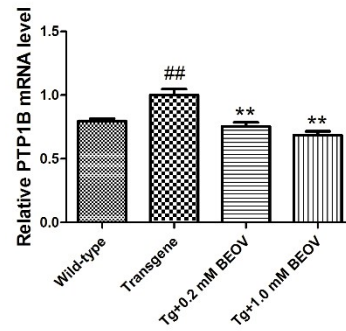

2

3 **Supplementary Fig. 6. BEOV altered the expression of the PPAR $\gamma$  and PTP1B**

4 **mRNAs in the cortex of 3 $\times$ Tg-AD mice.** Cortical expression of the PPAR $\gamma$  and PTP1B

5 mRNAs was assessed in WT, 3 $\times$ Tg-AD and BEOV-treated AD mice at 9 months of

6 age using qRT-PCR (A and B) (#: WT vs AD; \*: AD + BEOV vs AD). (n=5; # $P$ <0.05,

7 ## $P$ <0.01, \* $P$ <0.05, \*\* $P$ <0.01).

8

9

10

1 **Supplementary Fig. 7**

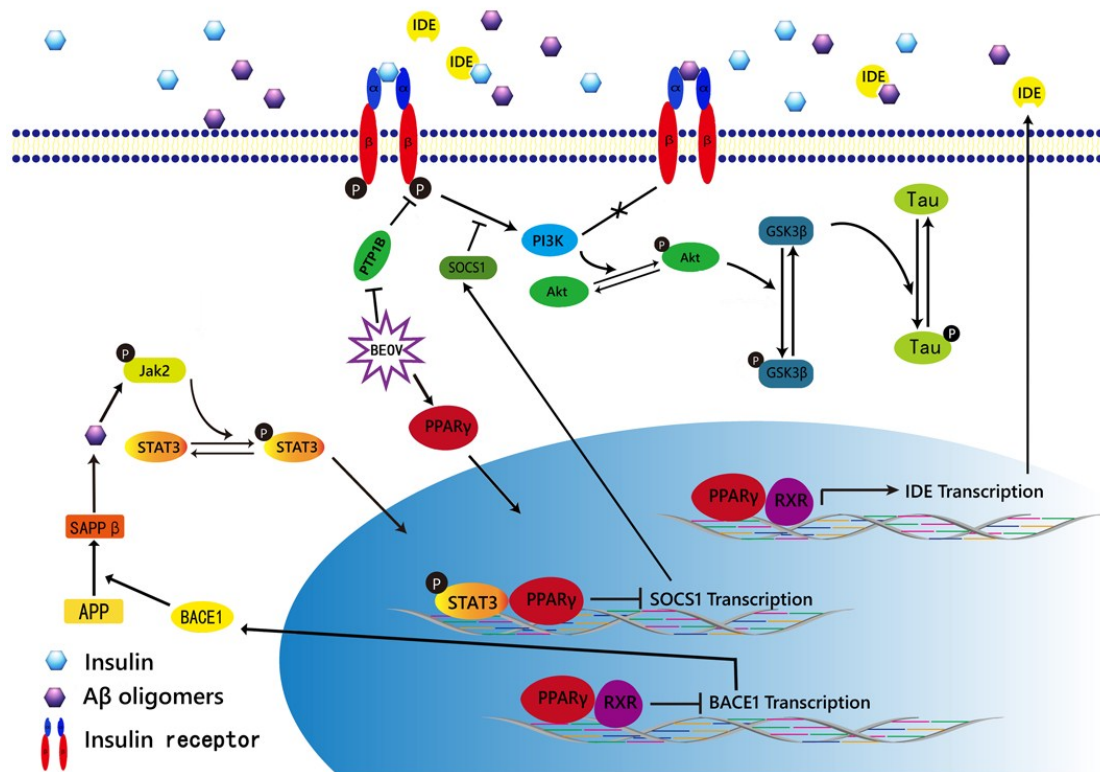

2

3 **Supplementary Fig. 7.** Schematic depicting the pathways by which BEOV attenuates  
 4 AD pathological hallmarks in neurons. This image illustrates how BEOV affects the  
 5 JAK2/STAT3/SOCS1 signaling pathway, IDE expression, Aβ generation,  
 6 PI3K/Akt/GSK3β signaling pathway and tau hyperphosphorylation through the  
 7 activation of PPARγ and inactivation of PTP1B. BEOV increases PPARγ activation to  
 8 induce the expression of IDE and decrease the expression of BACE1 and SOCS1,  
 9 subsequently attenuating Aβ-induced insulin resistance and stimulating insulin signal  
 10 transduction. BEOV also inhibits PTP1B activity to promote insulin sensitivity and to  
 11 inhibit Aβ and tau pathology.

12

13 **Supplementary videos 1-5**
